# Supplementary material
Source: bioRxiv or medRxiv preprint supplement (https://www.biorxiv.org/highwire/filestream/126547/field_highwire_adjunct_files/0/420281-1.pdf)
Supplement: Supplementary file [file 420281-1.pdf]

## General information

**Question 1:** How old are you? (*Open-ended*)

**Question 2:** What is your sex/gender? (*Multiple choice*)

- Female
- Male
- Other

**Question 3:** In which school year are you enrolled? (*Multiple choice*)

- 1st
- 2nd
- 3rd
- 4th
- 5th

**Question 4:** What kind of mobile device do you have? [Check all that apply]

- iPhone/iPod touch
- iPad
- Android (phone or tablet)
- Blackberry
- Computer/Laptop
- Other (please specify)

## School and house

**Question 5:** Do you use any of the devices mentioned previously for learning purposes at the university? Understanding by learning to improve your comprehension, memory and execution. (*Multiple choice*)

- Yes
- No

**Question 6:** Do you consider that the EMUP provides you with support or actions that facilitate the use of electronic devices? If you think so, mention how. (*Open-ended*)

**Question 7:** Have you used any of your devices for any of the following purposes? [Check all that apply]

- Take notes
- Search for information about drugs
- Practical guides
- Read sources of information such as DynaMed or UpToDate
- Medical calculators
- Differential diagnoses

- Read medical articles
- Contact doctors or teachers to solve doubts
- Other (please specify)

**Question 8:** Do you know that your university provides access to medical information sources?  
(Multiple choice)

- Yes
- No

**Question 9:** If your previous answer was Yes, specify which ones you have accessed.  
(Open-ended)

**Question 10:** Does the internet network of the university work properly? (Multiple choice)

- Always
- Sometimes
- Hardly ever
- Never

**Question 11:** In what way have the resources provided by the university been useful or not?  
(Open-ended)

**Question 12:** How often (in hours per week) do you use your devices for learning purposes?  
(Open-ended)

**Question 13:** Do you use any of your devices as a study source outside the university and the hospital? (Multiple choice)

- Yes
- No

**Question 14:** If your previous answer was Yes, write how often (in hours per week).  
(Open-ended)

**Question 15:** Do you use medical applications on any of your devices? (Multiple choice)

- Yes
- No

**Question 16:** Do you use any of the following applications? [Check all that apply]

- Medical calculator (ie. MedCalc)
- Reference sources (ie. MedScape, UpToDate)
- Pharmaceutical dictionaries (ie. PLM, Vademecum)
- Other (please specify)

**Question 17:** What difficulties have you had to access electronic sources in the university?  
[Check all that apply]

- Access to the network
- Not knowing what resources are available
- Not understanding how to use these resources
- Technical problems
- Lack of permissions
- Lack of time
- Other (please specify)

**Question 18:** Which book format do you consult most frequently? (*Multiple choice*)

- Virtual books
- Physical books
- Equal frequency

**Question 19:** Which type of class do you prefer? (*Multiple choice*)

- 100% oral
- With blackboard support
- With audiovisual support
- With active participation

**Question 20:** Why do you prefer this type of class? [Check all that apply]

- I pay more attention
- The visual support helps me
- I consider it more dynamic
- I find it useful to have the presentations available to study

**Question 21:** Did you consider your medical informatics course useful? (*Multiple choice*)

- Yes
- No

**Question 22:** What would you propose to improve it? (*Open-ended*)

**Question 23:** Have any of your teachers done activities with an electronic device during class?  
(*Open-ended*)

**Question 24:** Would you like more teachers to implement this type of dynamics? (*Multiple choice*)

- Yes
- No

**Question 25:** What do you propose for the school to support the use of electronic devices?  
(*Open-ended*)

**Question 26:** Do you study any subject in a hospital? (*Multiple choice*)

- Yes
- No

### **Hospital**

**Question 27:** Do you use any of these devices for learning purposes in the hospital? (*Multiple choice*)

- Yes
- No

**Question 28:** Have you received support for the use of electronic devices in any of the hospitals for which you have rotated? Specify which and where. (*Open-ended*)

**Question 29:** Have you used any of your devices for any of the following purposes? [Check all that apply]

- Take notes
- Search for information about drugs
- Practical guides
- Read sources of information such as DynaMed or UpToDate
- Medical calculators
- Differential diagnoses
- Read medical articles
- Contact doctors or teachers to solve doubts
- Other (please specify)

**Question 30:** What difficulties have you had to access sources of information in the hospital? [Check all that apply]

- Access to the network
- Not knowing what resources are available
- Not understanding how to use these resources
- Technical problems
- Lack of permissions
- Lack of time
- Other (please specify)

**Question 31:** In which hospitals have you had these difficulties? (*Open-ended*)

**Question 32:** Do you have Internet access in a hospital? Please specify in which one. (*Open-ended*)

**Question 33:** Do any of the hospitals in which you have rotated have an electronic file? Please specify in which one. (*Open-ended*)

**Question 34:** Would you like to have access to this type of files? (*Multiple choice*)

- Yes
- No

**Question 35:** What do you propose for hospitals to support the use of electronic devices?  
(*Open-ended*)

**Question 36\*:** Do you accept that your answers are used for the statistical analysis of our study?  
(*Multiple choice*)

- Yes
- No
